# Supplementary material
Source: PubMed Central journal article supplement (PMC4577203)
Supplement: pnas.1513075112.sapp.pdf [file pnas.1513075112.sapp.pdf]

## APPENDIX I. SUPPLEMENTARY INFORMATION.

Index:

1. Detailed Methods
2. Classification of African vegetation.
3. Principal biome collection areas for modern mammals.
4. Mixing lines for diet estimates and diet classification
5. Diets of mammalian lineages in the Pliocene and Pleistocene
6. Comparison of dietary guilds
7. Datasets
  1. Dataset I.
  2. Dataset II.
8. References
9. Tables
10. Figures

**1. Detail Methods.** Modern herbivore mammal samples were collected from 30 national parks and reserves and other regions in Kenya, Ethiopia, Uganda, Gabon, and the Democratic Republic of Congo (Table S1); these modern samples were supplemented with museum collections (University of Addis Ababa, American Museum of National History, Lwiro-CRSN, Field Museum, National Museums of Kenya) and using published values. The habitat localities included a range of biomes from desert shrublands to closed forests (Table S1). We use the classification of White (53) for discussion of African vegetation (Appendix, Section 2).

Fossils from the Turkana Basin from 4.3 to 1.0 Ma in age were sampled from the collections of the National Museums of Kenya. Bovids were identified to tribe; most other samples were identifiable to genus. We note in Dataset II when our taxonomic or stratigraphic assignments differ from the NMK catalog (*ca.* 20 of >900 specimens). For discussion of diets through geological time, we use taxonomic classification to tribe for the Bovidae, and to genus for all other large mammal families. Groupings were made by time-intervals, using the established correlations, stratigraphic nomenclature, and geochronologies of the Koobi Fora Formation, the Nachukui Formation, Kanapoi, and Shungura Formations (2-16). See Figure 2 for stratigraphic relationships.

$^{13}\text{C}/^{12}\text{C}$  ratios of hair, collagen, and tooth enamel were analyzed using standard methods (i.e, combustion in  $\text{O}_2$  for organic material; reaction with  $\text{H}_3\text{PO}_4$  for tooth enamel). Stable carbon isotopes were measured on hair or collagen samples on an isotope ratio mass spectrometer operating in continuous-flow mode after combustion at 1,600 °C in an elemental analyzer. Most bioapatites were pretreated using standard methods (3%

H<sub>2</sub>O<sub>2</sub> followed by 0.1 M buffered acetic acid) and then were reacted with 100% H<sub>3</sub>PO<sub>4</sub> with the resulting CO<sub>2</sub> being analyzed on a dual-inlet isotope ratio mass spectrometer; ivory samples were treated as in (17). Some fossil samples were too small for pre-treatment due to sampling restrictions: such small samples were corrected by comparison with samples run with and without treatment: the correction was 0.4‰ or less for these samples (see discussion in SI). Results are reported in the standard per mil (‰) notation:

$$\delta^{13}\text{C} = (R_{\text{sample}}/R_{\text{standard}} - 1) * 1000$$

where  $R_{\text{sample}}$  and  $R_{\text{standard}}$  are the <sup>13</sup>C/<sup>12</sup>C ratios of the sample and standard, respectively. The isotope standard is Vienna Pee Dee Belemnite (VPDB).

Bioapatite was assumed to be 11.1‰ enriched relative to hair, and 8.5‰ enriched relative to collagen as determined earlier (18, 19).  $\delta^{13}\text{C}$  values of modern hair, collagen, and bioapatite were corrected to a common reference time near the beginning of the Industrial Revolution, considered to be 1750, using atmospheric  $\delta^{13}\text{C}$  data for the change in isotopic ratio of atmosphere due to human activities (20, 21); the  $\delta^{13}\text{C}_{1750}$  value for atmospheric CO<sub>2</sub> is taken to be -6.3‰.  $\delta^{13}\text{C}$  of deep-sea carbonates shows that the  $\delta^{13}\text{C}$  of the atmosphere, and therefore the end-members for C<sub>3</sub> and C<sub>4</sub> plants, is essentially constant back to *ca.* 6 Ma (35, 36). Plant data from Cerling and Harris (18) were used to estimate mixing lines for C<sub>3</sub>- and C<sub>4</sub>-plants, corrected to  $\delta^{13}\text{C}_{1750}$ . All analyses from a single individual for both fossils and modern mammals were averaged to give a single isotopic ratio for that individual.

Due to small sample size, some fossil samples were not treated prior to analysis. We compared the results for treated and untreated samples for >200 samples; the average difference was *ca.* 0.4‰ (see Figure S1). We corrected untreated samples using the relationship

$$\delta^{13}\text{C}_{\text{corrected}} = 1.13 \delta^{13}\text{C}_{\text{untreated}} + 0.64$$

Reported results are for the corrected  $\delta^{13}\text{C}$  values.

**2. Classification of African vegetation.** Various schemes have been used to classify African vegetation (1, 22). Woody cover is readily quantified using a variety of methods, and so we adopt a vegetation classification system that is based primarily on woody cover (the United Nations Educational, Scientific, and Cultural Organization (UNESCO) classification of African vegetation; Ref 1). The principal vegetation types include forest, woodlands and grasslands, with some areas being mixed on the landscape scale (e.g., riparian woodlands associated with open woodlands or open grasslands). Forests have a continuous stand of trees at least 10-m tall with interlocking crowns; Woodland: an open-stand of trees at least 8-m tall with woody cover > 40% and a field layer dominated by grasses; Bushland: an open-stand of bushes usually between 3- and 8-m tall with woody cover > 40%; Thicket: a closed-stand of bushes and climbers usually between 3- and 8-m tall; Shrubland: an open- or closed-stand of shrubs up to 2-m tall; Wooded grassland: land covered with grasses and other herbs, with woody cover between 10 and 40%; Grassland: land covered with grasses and other herbs, with woody cover < 10%; Desert: Arid landscapes with a sparse cover dominated by sandy, stony or rocky substrate. This

classification does not define a boundary between forest and woodland in terms of woody cover, we will consider that “forest” has > 80% woody cover based on the requirement for “interlocking crown canopies”. Within this structure, the scale at which fossil collections are made in both space (often 10s of km<sup>2</sup>) and time (often 10<sup>2</sup> to 10<sup>5</sup> years) the mixing of habitats occurs: we consider mixed habitats as having elements both of forest (especially riparian forests or woodlands) with more open wooded grasslands or grasslands (i.e., savanna).

Woody cover in modern ecosystems can be quantified from ground observations and from satellite photography with results usually giving very close estimates (e.g., Ref 23). Here we make no distinction between woodland (woody cover > 8 m tall), bushland (woody cover 3 to 8 m tall) and shrubland (woody cover < 3 m tall) and use "woodland" synonymously for all three vegetation structure classes. It is useful therefore, to further subdivide the classification above as follows: 0 to 10% woody cover: *grassland*; 10 to 20 percent woody cover: *open woody grassland*; 20 to 40 percent woody cover: *wooded grassland*; 40 to 60 percent woody cover: *open grassy woodland*; 60 to 80 percent woody cover: *woodland*; 80 to 100 % woody cover: *forest*.

In the text, we minimize use of the term “savanna”, which suffers from colloquial misuse and, for that reason, is not recognized in the UNESCO classification. Still, a modern ecological definition of the term "savanna" is comprehensive and includes structural, functional and evolutionary aspects. Structurally, a savanna is a “mixed tree-grass systems characterized by a discontinuous tree canopy in a conspicuous grass layer” (24). This, and other common usage of the term would include at least “wooded grasslands” and “grasslands” in the UNESCO structural categories described above, although woody cover varies significantly within the savannas (25, 26). Rainfall is widely recognized as the primary determinant of woody cover along with tolerance to fire, herbivory, and soil fertility (26-28).

**3. Principal biome collection areas for modern mammals.** We collected the major large mammal extant taxa from 30 different regions in Eastern and Central Africa; collection regions, climate and ecological information is given in Table S1. Museum collections supplemented the collections we were able to make by visiting these localities. Collections were principally from National Parks (NP) and National Reserves (NR). Broader geographic regions were included as follows:

ABER Aberdares. Collections were from the park Headquarters (HQ) and local ranger stations; additional samples were collected by Kenya Wildlife Service (KWS) personnel. Museum samples included samples collected from forests north of Nairobi on the southern flanks of the Aberdares, but regions which are now outside the park boundaries.

AMBO Amboseli. Samples were from Koch (29) and Bocherens (30), with additional samples collected by KWS personnel.

ATHI Athi plains. Samples were from regions outside of the nearby Nairobi National Park. Samples were from game ranches and from museum collections.

- AWSH** Awash. Samples were from the Awash National Park HQ and samples collected within the park, with additional specimens from the larger Awash NP region from museum collections.
- BALE** Bale Mtns. Samples were from Bale NP and also from museum collections from nearby mountain regions of Ethiopia (south and east of Addis Ababa, elevation > 2500 m).
- CHYU** Chyulu Hills. Samples are from the Chyulu Hills NP; collections made by KWS personnel.
- ETHR** Ethiopian Rift lakes. Samples were from Rift Lake region of Ethiopia, including Nechisar NP.
- GMBA** Garamba. Samples are from Garamba NP in DR Congo.
- ITRI** Ituri Forest. Samples are from the Ituri NP in DR Congo.
- KBLE** Kibale National Park. Samples from Kibale NP; also includes data of Nelson (31).
- KCST** Kenya Coast. Samples are from the Boni NR and Arabuko-Sokoki NP, supplemented with museum samples collected from the coastal regions; also includes samples collected by KWS in the Tana delta region.
- KDPO** Kidepo. Samples from Kidepo NP.
- KZBG** Kuhuza-Biega. Samples are from the mountain sector of Kahuza-Biega NP and from forested mountains near Lake Kivu. "L" and "LP" samples are from the museum at CNRS-Lwiro.
- LAIK** Laikipia. Samples are from the Laikipia plateau region of Kenya.
- LEDW** Lake Edward. Samples are from Queen Elizabeth Park in Uganda, and the Ishango and Lulimbi regions of Virunga Park of DR Congo, all bordering Lake Edward.
- LOPÉ**. Samples were collected over 20 year period in Lopé National Park (data from Ref 32).
- MAGO** Omo / Mago. Samples are from the lower Omo Valley, principally from park headquarters region.
- MARA** Masai Mara. Samples are from the Serengeti plains, principally the Masai Mara region in Kenya with samples collected by KWS, but also including published samples in Tanzania (33, 34). Also includes museum specimens.
- MBRO**. Samples from Lake Mburo NP.
- MERU**. Samples from Meru NP, Bisandi NR, Kora NP and nearby regions.
- MTKE** Mt Kenya. Samples are from the Mt Kenya forests, including museum specimens.
- NAKG** Nakuru - shore. Samples are from the alkali grasslands in Nakuru NP.

- NBNP Nairobi NP. Samples are from Nairobi National Park, including the grasslands, the woodland - grassland transition, and the riparian corridors.
- RFTV Kenya Rift Valley. Samples are from the plains region from Lake Naivasha to Nakuru. This is principally wooded grasslands and grasslands; includes riparian woodlands and bushlands. Includes data from Ambrose and DeNiro (35).
- SAMB Samburu NR. Samples were principally from Samburu and Buffalo Springs NRs, supplemented by museum samples collected before NR boundaries were established.
- SIME Simien Mtns. Samples are from the Simien Mountains NP.
- TANA lower Tana River. Samples are from the plains of the lower Tana River, between Garissa and Garsen; samples do not include the Tana River delta region, which are grouped in KCST.
- TRKG Turkana - grassland. Samples were from the alkali grasslands on the eastern shore of Lake Turkana; from near Koobi Fora to Ileret. Includes data from (36).
- TRKX Turkana - regional. Samples were from the inland parts of the Turkana region, principally on the east side of Lake Turkana, but not including the alkali grasslands immediately adjacent to the lake. Also includes a few specimens on the west side of Lake Turkana. Includes data from (36).
- TSVO Tsavo NP. Samples were from both Tsavo East NP and Tsavo West NP and the greater region. Includes data from (37).

#### 4. Mixing lines and $\delta^{13}\text{C}$ assignments for $\text{C}_3$ -browsing, mixed $\text{C}_3/\text{C}_4$ , and $\text{C}_4$ -grazing.

Mixing lines for different estimating the fraction of  $\text{C}_3$ - and  $\text{C}_4$ -biomass contributions to herbivores are considered in the context of the range of  $\delta^{13}\text{C}$  plants found in African ecosystems, and on the range of isotope enrichment factors which are likely related to digestive physiology (38). Figure S2 shows the mixing lines derived using  $\delta^{13}\text{C}_{1750}$  values from modern African vegetation as discussed in the text, and the resulting mixing lines accounting for differences in isotope enrichment factors for enamel derived from diets of  $\text{C}_3$  and  $\text{C}_4$  biomass. The isotope mixing equation for biomass is:

$$\delta^{13}\text{C}_{i,\text{mix}} = f_{i,\text{C}_3} \delta^{13}\text{C}_{i,\text{C}_3} + f_{i,\text{C}_4} \delta^{13}\text{C}_{i,\text{C}_4}$$

Where  $i,\text{mix}$  is the mixture for xeric ( $i = x$ ) ecosystems or mesic ( $i = m$ ) ecosystems, respectively;  $f_{i,\text{C}_3}$  is the fractional contribution of  $\text{C}_3$  biomass to the xeric ecosystem or mesic ecosystem, respectively;  $f_{i,\text{C}_4}$  is the fractional contribution of  $\text{C}_4$  biomass to the xeric ecosystem or mesic ecosystem, respectively;  $\delta^{13}\text{C}_{i,\text{C}_3}$  is  $\delta^{13}\text{C}_{1750}$  value of  $\text{C}_3$  biomass end-member for the xeric ecosystem or mesic ecosystem, respectively;  $\delta^{13}\text{C}_{i,\text{C}_4}$  is  $\delta^{13}\text{C}_{1750}$  value of  $\text{C}_4$  biomass end-member for the xeric ecosystem or mesic ecosystem, respectively. End-member  $\delta^{13}\text{C}_{1750}$  values for  $\text{C}_3$  and  $\text{C}_4$  plants are taken to be  $-25.6\text{‰}$  and  $-11.2\text{‰}$ , respectively for xeric ecosystems; end-member  $\delta^{13}\text{C}_{1750}$  values are  $-26.6\text{‰}$  and  $-10.0\text{‰}$ , respectively, for mesic ecosystems (see text). The mixing line for tooth enamel is  $13.3$  to  $14.6\text{‰}$  enriched relative diet (38). Therefore, the thickness of the

mixing line for tooth enamel – and the projected fractions of C<sub>3</sub>- and C<sub>4</sub>-contributions to diet – results from the uncertainty in the end-member values for C<sub>3</sub>- and C<sub>4</sub>-dietary end-members and the isotope enrichment values.

To discuss dietary categories, it is necessary to define some terms. The isotope difference between C<sub>3</sub>- and C<sub>4</sub>-vegetation makes the grazing-browsing continuum easier to quantify. Because tropical grasses (below *ca.* 2500 m elevation) are almost exclusively C<sub>4</sub>, we define C<sub>4</sub>-grazers as having a predominantly C<sub>4</sub>-diet. *Hypergrazers* have a diet indistinguishable from 100% C<sub>4</sub>-diet; in Figure S2 this corresponds to tooth enamel values have  $\delta^{13}\text{C}_{1750} > +2\text{‰}$ . C<sub>3</sub>-dominated diets are considered to be browsers; note that this means that C<sub>3</sub> forbs contribute to the C<sub>3</sub>-browse diet as well as do the C<sub>3</sub>-woody plants. *Hyperbrowsers* have a diet indistinguishable from 100% C<sub>3</sub>-diet; in Figure S2 this corresponds to a  $\delta^{13}\text{C}_{1750}$  values  $< -12\text{‰}$ . In closed canopy forests, the understory can be very depleted in <sup>13</sup>C; a hyperbrowser with  $\delta^{13}\text{C}_{1750} < -14\text{‰}$  is likely to be a *closed canopy C<sub>3</sub>-browser*. The continuum of diets between the hypergrazers and hyperbrowsers is arbitrarily divided into C<sub>3</sub>-browsers, mixed C<sub>3</sub>-C<sub>4</sub> feeders, and C<sub>4</sub>-browsers. For convenience we define *C<sub>3</sub>-browsers* to have a C<sub>3</sub>-dominated diet ( $> ca. 75\%$  C<sub>3</sub>) and *C<sub>4</sub>-grazers* to have diets dominated by C<sub>4</sub> biomass ( $> ca. 75\%$  C<sub>4</sub>). Those with intermediate diets are called *C<sub>3</sub>-C<sub>4</sub> mixed feeders*. For this paper, this gives the following ranges for the stable isotope dietary classification as derived from Figure S2:

- $\delta^{13}\text{C}_{1750} > 2\text{‰}$ : C<sub>4</sub>-hypergrazers
- $\delta^{13}\text{C}_{1750} > -1\text{‰}$ : C<sub>4</sub>-grazers
- $\delta^{13}\text{C}_{1750} > -1\text{‰}$  and  $< -8\text{‰}$ : C<sub>3</sub>-C<sub>4</sub> mixed feeders
- $\delta^{13}\text{C}_{1750} < -8\text{‰}$ : C<sub>3</sub>-browsers
- $\delta^{13}\text{C}_{1750} < -12\text{‰}$ : C<sub>3</sub>-hyperbrowsers
- $\delta^{13}\text{C}_{1750} < -14\text{‰}$ : C<sub>3</sub>-closed canopy browsers

We note that the isotope enrichment factor may vary by  $>1\text{‰}$  in the mammals considered in this paper, and that some minor differences in the  $\delta^{13}\text{C}_{1750}$  values for enamel when comparing different taxa (e.g., suids to bovids) could arise from this difference. Evaluation of these enrichment factors could play a role in the future understanding the paleo-physiologies of digestion of the fossil mammal taxa. Given this uncertainty, we expect that the  $\delta^{13}\text{C}_{1750}$  ranges used here may be changed in the future to recognize such physiological differences for certain taxa.

Table S2 shows the average  $\delta^{13}\text{C}_{1750}$  values for the individual species analyzed in this study. Table S3 shows the distribution of C<sub>4</sub>-grazers, mixed C<sub>3</sub>-C<sub>4</sub> feeders, and C<sub>3</sub>-browsers in each of the modern ecosystems considered in this study. Table S4 shows the average  $\delta^{13}\text{C}$  values (tribe or genus) for modern and fossil time intervals for East and Central African large herbivore taxa (tribe/genus), summarized from Datasets I and II. Figures S4 and S5 show the trend over time for the diets of major lineages in the Turkana Basin for the normalized proportions of C<sub>4</sub>-grazers, C<sub>3</sub>-C<sub>4</sub> mixed, and C<sub>3</sub>-browsers (G:M:B) with comparison to the modern diets of those lineages.

**5. Diets of mammalian lineages in the Pliocene and Pleistocene.** The mammalian lineages considered here derive from different members of the Kanapoi, Koobi Fora, and Nachukui formations and are of comparable age to the Shungura Formation in the lower Omo Valley as shown in Figure 2. Time intervals employed are as follows from oldest to youngest: > 4 Ma; 4.0 to 3.6 Ma, 3.6 to 3.4 Ma; 3.4 to 3.0; 3.0 to 2.5 Ma; 2.5 to 2.35 Ma; 2.35 to 1.9 Ma; 1.9 to 1.5 Ma; 1.5 to 1.3 Ma; 1.3 to 1.0 Ma.

***Artiodactyla: Bovidae.*** The Bovidae comprise the most diverse large mammal family in Africa today, with dietary specialties ranging from closed-canopy  $C_3$ -hyperbrowsers to  $C_4$ -hypergrazers. Isotopic results on modern bovid specimens confirm previous observations (39, 40) for diets of East African and southern African bovids; however, as is shown below, many fossil bovids have a distinctly different diet than that of their modern counterparts.

Aepycerotini are today represented by the impala (*Aepyceros melampus*), which has a mixed diet throughout most of its modern range with an average  $\delta^{13}C_{1750}$  value of  $-3.9 \pm 2.6$  (n = 66); the relative proportions of modern individuals with grazing:mixed:browsing (G:M:B) diets is 15:77:8 (Table 1 and Table S2). Aepycerotini from the > 4.0 Ma interval have a G:M:B diet of 25:50:25 (n = 24), whereas those from all younger intervals together have a G:M:B diet of 53:47:0 (n = 43). Modern Aepycerotini have diets closer to their relatives 4.3 to 4.0 Ma in age, whereas from 4.0 to 1.0 Ma the Aepycerotini had a stronger grazing component to their diet than do their modern relatives

Alcelaphini consistently have the highest  $\delta^{13}C$  of any bovid tribe or of any other APP taxa in East and Central Africa. All four genera of modern alcelaphins (*Alcelaphus*, *Beatragus*, *Connochaetes*, *Damaliscus*) have average  $\delta^{13}C_{1750}$  values  $>2\text{‰}$ , indicating a pure or nearly pure- $C_4$  diet; few other modern APP taxa achieve such positive  $\delta^{13}C_{1750}$  values. As previously noted (39, 40) such high values indicate either extreme selectivity in diets or that the isotope enrichment factor is especially high for alcelaphins compared to other mammals including other bovids.

Throughout the Pliocene and Pleistocene record in the Turkana Basin, alcelaphins have the highest, or second highest  $\delta^{13}C$  value for any mammalian taxon within any time interval, with average values between  $-0.2$  and  $2.0\text{‰}$  (G:W:B = 93:7:0; n = 129 individuals in the fossil record). Fossil specimens have slightly more negative  $\delta^{13}C$  values than modern alcelaphins; thus, using the  $^{13}C/^{12}C$  ratios defining hypergrazers discussed in this paper, none of the fossil alcelaphins are hypergrazers whereas most modern alcelaphins are hypergrazers.

Antilopini in our study include four extant genera—*Eudorcas* (Thomson's gazelle), *Litocranius* (gerenuk), *Nanger* (Grant's and Soemmering's gazelles), and *Oreotragus* (klipspringer). *Eudorcas* is primarily a grazer, *Litocranius* and *Oreotragus* are browsers, and *Nanger* is a mixed-feeder to browser (Table S2). Fossil Antilopini are difficult to distinguish from fossil Aepycerotini using only the dental material available for isotopic study; as a result, these fossil specimens are provisionally classified as Antilopini based on the judgment of the authors and generally agree with identifications in the Turkana Basin fossil catalog (41). Fossil Antilopini from the Turkana basin had diets with a much higher fraction of  $C_4$ -grass than those of modern Antilopini, especially the larger

members of the tribe. From *ca.* 4.3 to 2.35 the G:M:B proportion of antilopins is *ca.* 17:75:8 (n = 12), but from 2.35 to 1.0 Ma it is 54:46:0 (n = 26).

Bovini are today represented in Africa by the Cape buffalo (*Syncerus caffer*); domestic cattle are not reported here. The diet of the Cape buffalo ranges from pure-grazing in most open ecosystems to pure-browsing in closed forests. Fossil Bovini in the Turkana Basin were primarily C<sub>4</sub>-grazers but with some C<sub>3</sub>-C<sub>4</sub> mixed feeders (G:M:B = 76:24:0, n = 21). *Syncerus* are primarily C<sub>4</sub>-grazers in most non-forested regions of East Africa.

Caprini are represented today in East and Central Africa by the Walia ibex (*Capra walie*), which has a C<sub>3</sub> diet (Table S2); it is restricted to high mountains in Ethiopia. Domestic caprins (sheep and goats) are present throughout East and Central Africa but are not reported here. Caprins are very rare in the Kanapoi, Nachukui or Koobi Fora Formations and none have been sampled for stable isotopes.

Cephalophini are represented in Africa today by the forest duikers (*Cephalophus* and *Philantomba*) and the bush duiker (*Sylvicapra*). All are C<sub>3</sub>-browsers (Table S2). Cephalophini fossils are rare in the Kanapoi, Nachukui or Koobi Fora Formations; no fossil duikers have been sampled for stable isotopes from these formations.

Hippotragini are C<sub>4</sub>-grazers today (G:M:B = 89:11:0; n = 38) as were most fossil hippotragins younger than 2.5 Ma (G:M:B = 80:20:0; n = 10). However, hippotragins from early stratigraphic intervals *ca.* 4 to 2.35 Ma in age, had a mixed C<sub>3</sub>-C<sub>4</sub> diet (G:M:B = 29:71:0; n = 7) although the sample size is limited.

Neotragini today are mostly C<sub>3</sub>-browsers with the exception of the oribi (*Ourebia ourebi*), which is a mixed C<sub>3</sub>-C<sub>4</sub> feeder to C<sub>4</sub>-grazer. Neotragin fossils are very rare in the Kanapoi, Nachukui, and Koobi Fora Formations.

Reduncini are today represented in 17 of the ecosystems we consider and are represented by four species: the waterbuck (*Kobus ellipsiprymnus*), the Ugandan kob (*Kobus kob*), Chanler's reedbuck (*Redunca fulvorufula*), and the Bohor reedbuck (*Redunca redunca*). The modern reduncins that we examined are primarily C<sub>4</sub>-grazers (Table S2), with only a few mixed C<sub>3</sub>-C<sub>4</sub> feeders that are generally associated with mountain habitats (e.g., Mt. Kenya, Bale Mountains; see Dataset I). Fossil reduncins in the Nachukui and Koobi Fora Formations are also primarily grazers (Dataset II and Figure S4).

Tragelaphini, the spiral-horned antelopes, today have diets strongly skewed towards browsing (Table 1 and Table S2). Although stable isotope data show the bongo and bushbuck to be hyper-browsers, all others are browsers. The eland, lesser kudu, and greater kudu have  $\delta^{13}\text{C}_{1750}$  values averaging between *ca.* -8.5‰ and -10‰ and some individuals have a mixed C<sub>3</sub>-C<sub>4</sub> diet (i.e., average  $\delta^{13}\text{C}_{1750}$  between -1‰ and -8‰). However, the average  $\delta^{13}\text{C}$  for fossil tragelaphins from all stratigraphic intervals is > -8‰ indicating that, on average, tragelaphins had a mixed C<sub>3</sub>-C<sub>4</sub> diet for the period from 4 to 1 Ma. The extant tragelaphin with the most positive  $\delta^{13}\text{C}_{1750}$  value is the eland (*Taurotragus oryx*,  $\delta^{13}\text{C}_{1750} = -8.5 \pm 2.1$ , n = 35; G:M:B = 0:31:69); its  $\delta^{13}\text{C}$  values are significantly different (P = 0.0002) than the average of all fossil specimens of tragelaphins ( $\delta^{13}\text{C} = -5.9 \pm 2.9$ , n = 43; G:M:B = 7:67:26). Thus, fossil tragelaphins in



the Nachukui and Koobi Fora regions record a diet different than that of any extant tragelaphin species in East and Central Africa: fossil tragelaphins were predominantly mixed C<sub>3</sub>-C<sub>4</sub> feeders, but extant tragelaphins are browsers or hyperbrowsers. Studies of tragelaphini in the Shungura Formation, in the lower Omo Valley, have previously noted  $\delta^{13}\text{C}$  values that are more enriched in <sup>13</sup>C than extant tragelephins (42).

**Artiodactyla: Giraffidae.** The Giraffidae were represented in Africa from 4.3 Ma to the present Ma by 3 genera: *Giraffa*, *Okapia*, and *Sivatherium*. Extant giraffes live in open woodland habitats and the okapi is a forest-dweller. *Sivatherium* became extinct by ca. 1 Ma.

Extant giraffes are primarily browsers with only a small fraction being mixed feeders based on carbon isotope data ( $\delta^{13}\text{C}_{1750} = -10.6 \pm 1.6$  (n=61); G:M:B = 0:7:93). Fossil *Giraffa* from the Kanapoi, Nachukui and Koobi Fora Formations had a similar diet ( $\delta^{13}\text{C} = -11.4 \pm 1.1$  (n =38); G:M:B = 0:0:100). Thus, *Giraffa* has not significantly changed its diet from 4 Ma to present.

African sivatheres were large bodied, short-necked giraffids that changed diet over time with associated morphological changes (43). *Sivatherium* specimens older than 2.35 Ma have a  $\delta^{13}\text{C} = -10.4 \pm 1.6\text{‰}$  (n = 10; G:M:B = 0:10:90) indicating a diet dominated by C<sub>3</sub>-biomass; *Sivatherium* specimens from 2.35 to 1.9 have a  $\delta^{13}\text{C} = -4.6 \pm 2.5\text{‰}$  (G:M:B = 0:80:20; n = 5); *Sivatherium* specimens younger than 1.9 Ma have a  $\delta^{13}\text{C} = -1.2 \pm 2.3$  (G:M:B = 67:33:0; n = 9). Thus, between 3 and 1.5 Ma *Sivatherium* changed from a C<sub>3</sub>-browsing to a C<sub>4</sub>-grazing giraffid. The sample size so far is too small to determine the details of the timing of this change.

**Artiodactyla: Hippopotamidae.** In East and Central Africa *Hippopotamus amphibius*, the extant hippo, has a diet that ranges from C<sub>3</sub>-dominated to C<sub>4</sub>-dominated (44-46). The 186 modern *H. amphibius* sampled have an average  $\delta^{13}\text{C}_{1750}$  value of  $-2.1 \pm 2.6\text{‰}$  (G:M:B 36:61:3) indicating a predominantly mixed diet although approximately 40% of modern hippos have a grazing diet.

Two genera of hippos have been recognized in the Kanapoi, Nachukui, and Koobi Fora Formations. Early workers identified these as *Hippopotamus* and *Hexaprotodon* (47) but the latter is referred to cf. *Hippopotamus* (48) pending selection of a new name for this genus. In this paper we group *Hippopotamus* and cf. *Hippopotamus* as *Hippopotamus sensu lato*.

The Pliocene and earliest Pleistocene hippos in the Kanapoi, Nachukui, and Koobi Fora Formations (4.3 to 2.35 Ma) have an average  $\delta^{13}\text{C}$  value of  $-3.3 \pm 2.9$  (G:M:B = 23:71:6, n = 48). However, hippos 2.35 to 1.0 Ma in age have an average  $\delta^{13}\text{C}$  value of  $-1.1 \pm 1.4\text{‰}$  (G:M:B = 49:51:0). Thus, through the past 4.3 Ma hippos in East Africa have had diets that are strongly biased towards C<sub>4</sub>-vegetation, with overall G:M:B proportions between ca. 75:25:0 to ca. 25:75:0. Although many hippos are predominantly C<sub>4</sub>-grazers, occasional opportunistic individuals, both modern and fossil, have isotopic values that record a very high fraction (i.e., >75%) of C<sub>3</sub> biomass in the diet such that they are considered to be C<sub>3</sub>-browsers.

**Artiodactyla: Suidae.** The three genera of suids in East and Central Africa—*Hylochoerus* (the forest hog), *Phacochoerus* (warthog), and *Potamochoerus* (bush and

red river hogs)—have different  $\delta^{13}\text{C}$  dietary niches (49) with average  $\delta^{13}\text{C}_{1750}$  values of  $-14.1 \pm 3.3\text{‰}$  ( $n = 26$ ),  $-0.1 \pm 2.4\text{‰}$  ( $n = 101$ ), and  $-10.9 \pm 3.9\text{‰}$  ( $n = 46$ ), respectively; these genera have corresponding G:M:B proportions of 0:0:100; 80:18:2, and 2:22:76, respectively. *Hylochoerus* is a  $\text{C}_3$ -hyperbrowser (i.e.,  $\delta^{13}\text{C}_{1750} < -12\text{‰}$ ) in forested regions (Ituri, Kahuzi-Biega, Kibale, Mt. Kenya, Aberdares); many individuals from these forests have  $\delta^{13}\text{C}_{1750}$  values  $< -14\text{‰}$  indicating a diet derived from closed canopy understory (49, 50). *Potamochoerus* is a  $\text{C}_3$ -hyperbrowser in the Kahuzi-Biega and Ituri closed forests.

Four lineages of suids are found in the Plio-Pleistocene of East Africa: *Nyanzachoerus*—*Notochoerus*, *Kolpochoerus*—*Hylochoerus*, *Metridiochoerus*—*Phacochoerus*, and *Potamochoerus*. Evolutionary trends of suids related to dental changes from 4 to 1 Ma were discussed by Harris and Cerling (49). *Notochoerus* specimens were predominantly a mixed  $\text{C}_3$ - $\text{C}_4$  feeder between 4.3 and 4.0 Ma ( $\delta^{13}\text{C} = -3.4 \pm 2.7$ , G:M:B = 25:75:0; ( $n = 8$ ), but were predominantly  $\text{C}_4$ -grazers by 2.0 Ma (Upper Burgi Member in the Koobi Fora Formation;  $\delta^{13}\text{C} = -0.7 \pm 0.5$ ; G:M:B = 83:17:0,  $n = 12$ ). *Kolpochoerus* and *Metridiochoerus* were predominantly grazers throughout the intervals sampled with high  $\text{C}_4$ -grazer proportions (G:M:B = 82:18:0 ( $n = 38$ ) and 93:7:0 ( $n = 67$ , respectively)). By 2.0 Ma, the region had three sympatric genera of suids that were  $\text{C}_4$ -grazers. Of these, the *Nyanzachoerus*-*Notochoerus* lineage became extinct, the *Kolpochoerus*-*Hylochoerus* lineage exploited more closed habitats and became  $\text{C}_3$ -browsers in the past 1 Ma, and the *Metridiochoerus*-*Phacochoerus* lineage continued as  $\text{C}_4$ -grazers.

**Perissodactyla: Equidae.** Today, African equids are represented by species of the genus *Equus*. Extant *Equus* is a  $\text{C}_4$ -grazer with an average  $\delta^{13}\text{C}_{1750}$  value of  $1.3 \pm 1.4\text{‰}$  ( $n = 147$ ) with G:M:B proportions of 91:8:1. The most positive  $\delta^{13}\text{C}$  value is  $3.7\text{‰}$ , approximately one per mil less enriched in  $^{13}\text{C}$  than the most positive alcelaphin. This difference in isotope values for equids compared to alcelaphins, both widely thought to be pure  $\text{C}_4$ -grazers, may be related to the difference in isotopic enrichment by hind-gut fermenting equids compared to ruminating bovids (see 18, 38).

Fossil equids in the Nachukui and Koobi Fora Formations are represented by two genera. The hippionin *Eurygnathohippus* (51, 52) is present from before 4 Ma to ca. 1.5 Ma; it is a  $\text{C}_4$ -grazer with an average  $\delta^{13}\text{C}$  value of  $-0.3 \pm 1.2\text{‰}$  ( $n = 33$ ) and G:M:B proportions of 79:21:0. *Equus* is present in the Omo-Turkana Basin from 2.3 Ma onwards; its average  $\delta^{13}\text{C}$  value is  $-0.1 \pm 1.1\text{‰}$  ( $n = 39$ ) with G:M:B proportions of 82:18:0. Thus, there is virtually no difference in diets of the two equid lineages based on stable isotope evidence.

Of the two  $\text{C}_4$ -grazing equids present in the Nachukui and Koobi Fora Formations, *Eurygnathohippus*, representing the *Hipparion* lineage, became extinct in Africa during the middle Pleistocene (52). *Equus* has been a  $\text{C}_4$ -grazing equid since its first appearance in Africa during the late Pliocene.

**Perissodactyla: Rhinocerotidae.** The two extant genera of rhinos in East and Central Africa, *Diceros* and *Ceratotherium*, have distinctly different diets. *Diceros* is a  $\text{C}_3$ -browser with an average  $\delta^{13}\text{C}_{1750}$  value of enamel of  $-10.2 \pm 1.2\text{‰}$  ( $n = 145$ ; G:M:B = 0:6:94) while *Ceratotherium* is a  $\text{C}_4$ -grazer with a  $\delta^{13}\text{C}_{1750}$  value of  $+1.4 \pm 1.2\text{‰}$  ( $n = 13$ ; G:M:B = 100:0:0).

Many of the fossil rhinocerotids analyzed were so fragmentary that identification to genus was not possible. We grouped analyses into "B" (values with  $\delta^{13}\text{C} < -5\text{‰}$ ) and "G" (values with  $\delta^{13}\text{C} > -5\text{‰}$ ); this resulted in a clear separation into two groups as no analyses were between  $-1\text{‰}$  and  $-7\text{‰}$ . "Rhino B" and "Rhino G" had an average  $\delta^{13}\text{C}$  values of  $-10.1 \pm 1.2\text{‰}$  ( $n = 17$ ; G:M:B 0:6:94) and  $0.3 \pm 0.8$  ( $n = 19$ ; G:M:B = 100:0:0), respectively. These values are indistinguishable from those of modern *Diceros* and *Ceratotherium*, respectively. However, many Miocene rhinos in East Africa, older than those sampled here, had  $\text{C}_3$ - $\text{C}_4$  mixed diets (53).

Thus, the fossil record of rhinos in the Nachukui and Koobi Fora Formations comprises two groups of rhinos with similar  $\delta^{13}\text{C}$  values to the two modern extant rhinos.

**Proboscidea; Deinotheriidae.** Deinotheres are an extinct family of proboscideans that were present in Africa for the past 25 or so million years, becoming extinct in the early to middle Pleistocene. Deinotheres from the Nachukui and Koobi Fora Formations are  $\text{C}_3$ -browsers, with an average  $\delta^{13}\text{C}$  of  $-12.7 \pm 0.8$  ( $n = 28$ ; G:M:B = 0:0:100). *Deinotherium* has, in most stratigraphic intervals, the most  $^{13}\text{C}$ -depleted  $\delta^{13}\text{C}_{\text{enamel}}$  of any fossil taxon in the basin.

**Proboscidea; Elephantidae.** *Loxodonta* is the only extant elephantid genus in Africa. *Loxodonta* is a  $\text{C}_3$ -browser to  $\text{C}_3$ - $\text{C}_4$ -mixed feeder (54). Modern *Loxodonta* is represented by two species. The savanna elephant, *Loxodonta africana* has an average  $\delta^{13}\text{C}_{1750}$  value of  $-9.2 \pm 2.4\text{‰}$  (G:M:B = 0:24:76;  $n = 225$ ); the forest elephant, *Loxodonta cyclotis*, has a  $\delta^{13}\text{C}_{1750}$  value of  $-14.1 \pm 1.3$  (G:M:B = 0:0:100;  $n = 55$ ).

Two elephant genera are recorded in the stratigraphic intervals under discussion: *Elephas* and *Loxodonta*. *Elephas* was more abundant than *Loxodonta* from 4 to 1 Ma in the Turkana Basin. *Elephas* had a  $\text{C}_3$ - $\text{C}_4$ -mixed diet from 4.3 to 4.0 Ma ( $\delta^{13}\text{C} = -2.7 \pm 1.1\text{‰}$  ( $n = 7$ ; G:M:B = 0:100:0)) but had evolved into a  $\text{C}_4$ -grazer by the early Pleistocene ( $\delta^{13}\text{C} = -0.4 \pm 1.2\text{‰}$  ( $n=17$ ; G:M:B = 82:18:0)). *Loxodonta* shows a similar trend: for the lowest stratigraphic intervals, from 4.0 to 2.35 Ma, *Loxodonta* was a mixed  $\text{C}_3$ - $\text{C}_4$ - feeder (average  $\delta^{13}\text{C} = -2.1 \pm 1.6$  ( $n=12$ ; G:M:B = 17:83:0) whereas it was a  $\text{C}_4$ -grazer for the period from 2.35 to 1.9 Ma (average  $\delta^{13}\text{C} = 0.1 \pm 0.4$  ( $n = 5$ ; G:M:B = 100:0:0)).

The two elephantids present in the Turkana Basin from 4 to 1 Ma were both mixed  $\text{C}_3$ - $\text{C}_4$ -feeders at 4 Ma and gradually changed their diets to become  $\text{C}_4$ -grazers by 2 Ma. *Elephas* became extinct in the middle to late-Pleistocene; *Loxodonta* persists but extant *Loxodonta* is a  $\text{C}_3$ -browser to  $\text{C}_3$ - $\text{C}_4$ - mixed feeder.

**Proboscidea; Gomphotheriidae.** *Anancus* is the only gomphotheriid recovered from this stratigraphic interval, becoming extinct in the basin in the Pliocene. A single *Anancus* tooth from the sub-A stratigraphic interval has a  $\delta^{13}\text{C}$  value of  $-0.1\text{‰}$ , indicating a  $\text{C}_4$ -grazing diet.

**6. Comparison of dietary guilds.** The fossil record has only rare specimens of the bovid tribes Neotragi and Cephalophini. Therefore, we have used the modern collections for comparison but in Figures 3 and 4 we have excluded the modern and fossil Neotragini and Cephalophini from the analysis. Figure S3 shows that modern the fractions of  $\text{C}_4$ -

grazing, mixed C<sub>3</sub>-C<sub>4</sub>, and C<sub>3</sub>-browsing taxa have similar proportions for the 30 modern ecosystems, whether including all taxa (Figure S3A) or excluding the Neotragini and Cephalophini (Figure S3B) in the analysis. All data from Dataset I.

## 7. Datasets

**7.1. Dataset I.** Dataset I includes  $\delta^{13}\text{C}$  values as measured for >1900 modern individual mammals from East and Central Africa. Geographic origin, estimated year of death, and ecosystem groupings presented.  $\delta^{13}\text{C}$  values presented as the original data for enamel, keratin, or collagen, with the equivalent  $\delta^{13}\text{C}(\text{enamel})$ , and the enamel value corrected to  $\delta^{13}\text{C}_{1750}$  (see text). Data is from this study and references (18, 29-37, 44-45, 49-50, 54-56). Geographic location and date of death is estimated from information provided by collector and vary in degree of accuracy.

**7.2 Dataset SI II.** Dataset II includes  $\delta^{13}\text{C}$  values for fossils collected from the Kanapoi, Nachukui, and Koobi Fora Formations in the Omo-Turkana Basin, Kenya. Data is from this study and from references (37, 49, 54, 57-58)

## 8. Supplementary Information References

- 1 White F (1983) *The vegetation of Africa: a descriptive memoir to accompany the UNESCO/AETFAT/UNSO vegetation map of Africa by F White*. Natural Resources Research Report XX, UNESCO, Paris, France.
- 2 Cerling TE, Brown FH (1982) Tuffaceous marker horizons in the Koobi Fora region and the lower Omo Valley. *Nature* 299: 216- 221.
- 3 Brown FH, Feibel CS (1986) Revision of lithostratigraphic nomenclature in the Koobi Fora region, Kenya. *J Geol Soc London* 143(2): 297-310.
- 4 Harris JM, Brown FH, Leakey MG (1988) Stratigraphy and paleontology of Pliocene and Pleistocene localities west of Lake Turkana, Kenya. *Natural History Museum of Los Angeles County, Contributions in Science* 399: 1-128.
- 5 Harris JM, et al (1988) Stratigraphy and paleontology of the Nachukui Formation, Lake Turkana region, Kenya. *Natural History Museum of Los Angeles County, Contributions in Science* 399: 1-128.
- 6 Leakey MG, Feibel CS, McDougall I, Walker A (1995) New four-million-year-old hominid species from Kanapoi and Allia Bay, Kenya. *Nature* 376: 565-571.
- 7 Leakey MG, Feibel CS, McDougall I, Ward, C, Walker, A (1998) New specimens and confirmation of an early age for *Australopithecus anamensis*. *Nature* 393:62-66.
- 8 Feibel CS (2003) Stratigraphy and depositional setting of the Pliocene Kanapoi Formation, lower Kerio valley, Kenya. *Natural History Museum of Los Angeles County, Contributions in Science* 498: 9-20.

- 9 Brown FH, Haileab B, McDougall I (2006) Sequence of tuffs between the KBS Tuff and the Chari Tuff in the Turkana Basin, Kenya and Ethiopia. *J Geol Soc London* 163: 185–204.
- 10 McDougall I, Brown FH (2006) Precise  $^{40}\text{Ar}/^{39}\text{Ar}$  geochronology for the upper Koobi Fora Formation, Turkana Basin, northern Kenya. *J Geol Soc London* 163: 205–220.
- 11 McDougall I, Brown FH (2008) Geochronology of the pre-KBS Tuff sequence, Omo Group, Turkana Basin. *J Geol Soc London* 165: 549–562.
- 12 Lepre CJ, Kent DV (2010) New magnetostratigraphy for the Olduvai Subchron in the Koobi Fora Formation, northwest Kenya, with implications for early Homo. *Earth Planetary Sci Lett* 290: 362–374.
- 13 Joordens JC, et al. (2011) An astronomically-tuned climate framework for hominins in the Turkana Basin. *Earth Planet Sci Lett* 307: 1–8.
- 14 Brown FH, McDougall I (2011) Geochronology of the Turkana depression of northern Kenya and southern Ethiopia. *Evolutionary Anthropology: Issues, News, and Reviews* 20.6: 217–227.
- 15 McDougall I, et al (2012) New single crystal  $^{40}\text{Ar}/^{39}\text{Ar}$  ages improve timescale for deposition of the Omo Group, Omo-Turkana Basin, East Africa. *J Geol Soc London* 169: 213–226.
- 16 McDougall I (2014) K/Ar and  $^{40}\text{Ar}/^{39}\text{Ar}$  Isotopic dating techniques as applied to young volcanic rocks, particularly those associated with hominin localities. In: Cerling TE (ed) *Treatise of Geochemistry Volume 14: Archaeology and Anthropology*, Elsevier, New York. p. 1–15.
- 17 Cerling TE, Omondi P, Macharia AN (2007) Diets of Kenyan elephants from stable isotopes and the origin of confiscated ivory in Kenya. *Afr J Ecol* 45: 614–623.
- 18 Cerling TE, Harris JM (1999) Carbon isotope fractionation between diet and bioapatite in ungulate mammals and implications for ecological and paleoecological studies. *Oecologia* 120: 347–363.
- 19 Lee-Thorp JA, Sealy JC, van der Merwe NJ (1989) Stable carbon isotope ratio differences between bone collagen and bone apatite, and their relationship to diet. *Jour Archaeol Sci* 16: 585–599.
- 20 Francey RJ, et al. (1999) A 1000-year high precision record of  $\delta^{13}\text{C}$  in atmospheric  $\text{CO}_2$ . *Tellus* 51: 170–193.
- 21 Keeling RF, Piper SC, Bollenbacher AF, Walker SJ (2010) Monthly atmospheric  $^{13}\text{C}/^{12}\text{C}$  isotopic ratios for 11 SIO stations. In *Trends: A Compendium of Data on Global Change. Carbon Dioxide Information Analysis Center, Oak Ridge National Laboratory, U.S. Department of Energy, Oak Ridge, Tenn., U.S.A.*
- 22 Pratt DJ, Greenway PJ, Gwynne MD (1966). A classification of East African rangeland, with an appendix on terminology. *J Appl Ecol*: 369–382.

- 23 Cerling et al (2011) Woody cover and hominin environments in the past 6 million years. *Nature* 476: 51–56.
- 24 Ratnam J (2011) When is a ‘forest’ a savanna, and why does it matter? *Global Ecol Biogeogr* 20.5: 653–660.
- 25 Sankaran M (2005) Determinants of woody cover in African savannas. *Nature* 438: 846–849.
- 26 Bond WJ (2008) What limits trees in C4 grasslands and savannas? *Ann Rev Ecol Evol Syst* 39: 641–659.
- 27 Lloyd J, et al (2008). Contributions of woody and herbaceous vegetation to tropical savanna ecosystem productivity: a quasi-global estimate. *Tree Physiol* 28(3): 451–468.
- 28 Good SP, Caylor KK (2011) Climatological determinants of woody cover in Africa. *Proc Nat Acad Sci* 108: 4902–4907.
- 29 Koch PL, Behrensmeyer AK, Fogel ML (1990) The isotopic ecology of plants and animals in Amboseli National Park, Kenya. *Ann Report Director, Geophys Lab.* Carnegie Inst, Washington DC. p. 163–171.
- 30 Bocherens H, Koch PL, Mariotti A, Geraads D, Jaeger JJ (1996) Isotopic biogeochemistry (13C 18O) of mammalian enamel from African Pleistocene hominid sites. *Palaios* 11: 306–318.
- 31 Nelson SV (2013) Chimpanzee fauna isotopes provide new interpretations of fossil ape and hominin ecologies. *Proc Royal Soc B: Biol Sci* 280: 20132324. doi.org/10.1098/rspb.2013.2324
- 32 Martin JE, Vance D, Balter V (2015) Magnesium stable isotope ecology using mammal tooth enamel. *Proc Nat Acad Sci* 112: 430–435.
- 33 Kingston JD (2011) Stable isotopic analyses of Laetoli fossil herbivores. (ed Harrison, T) *Paleontology and geology of Laetoli: Human evolution in context.* Springer Netherlands, p. 293-328.
- 34 van der Merwe NJ (2013) Isotopic ecology of fossil fauna from Olduvai Gorge at ca 1.8 Ma, compared with modern fauna. *S Afr Jour Sci* 109(11/12): 1-14.
- 35 Ambrose SH, DeNiro MJ (1986) The isotopic ecology of East African mammals. *Oecologia* 69: 395–406.
- 36 Cerling TE, Harris JM, Leakey MG, Mudida N (2003) Stable isotope ecology of Northern Kenya, with emphasis on the Turkana Basin, Kenya. In: MG Leakey and JM Harris (eds). *Lothagam: the Dawn of Humanity in Africa.* Columbia Univ. Press. p. 583–603.
- 37 Cerling TE, et al (2011) Diet of *Paranthropus boisei* in the early Pleistocene of East Africa. *Proc Nat Acad Sci* 108: 9337–9341.
- 38 Passey BH, et al (2005) Carbon isotopic fractionation between diet, breath, and bioapatite in different mammals. *Jour Archaeol Sci* 32: 1459–1470.

- 39 Cerling TE, Harris JM, Passey BH (2003) Dietary preferences of East African Bovidae based on stable isotope analysis. *Jour Mammal* 84: 456–471.
- 40 Sponheimer M et al (2003). Diets of southern African Bovidae: stable isotope evidence. *Jour Mammal* 84: 471–479.
- 41 Bobe R (2011) Fossil mammals and paleoenvironments in the Omo-Turkana Basin. *Evol Anthro* 20: 254–263.
- 42 Bibi F, Souron A, Bocherens H, Uno K, Boisserie JR (2013) Ecological change in the lower Omo Valley around 2.8 Ma. *Biol Lett* 9(1), 20120890.
- 43 Cerling TE, Harris JM, Leakey MG (2005) Environmentally driven dietary adaptations in African mammals. In Ehleringer JR, Dearing MD, Cerling TE (eds). *History of Atmospheric CO<sub>2</sub> and the Impacts on Plants, Animals, and Ecosystems*. Springer, New York. p. 258–272.
- 44 Cerling TE, et al (2008) Stable isotope ecology of modern Hippopotamus amphibius in East Africa. *Jour Zool* 276: 204–212.
- 45 Boisserie JT et al (2005) Diets of modern and late Miocene hippopotamids: evidence from carbon isotope composition and microwear of tooth enamel. *Palaeogeogr Palaeoclim Palaeoecol* 221: 153–174.
- 46 Souron A, Balasse M, Boisserie JR (2012) Intra-tooth isotopic profiles of canines from extant Hippopotamus amphibius and late Pliocene hippopotamids (Shungura Formation, Ethiopia): insights into the seasonality of diet and climate. *Palaeogeogr Palaeoclim Palaeoecol* 342: 97–110.
- 47 Coryndon SC (1977) The taxonomy and nomenclature of the Hippopotamidae (Mammalia, Artiodactyla) and a description of two new fossil species. *Proc Koninklijke Nederland Akad Wetenschappen* 80: 61–68.
- 48 Boisserie JR (2005) The phylogeny and taxonomy of the Hippopotamidae (Mammalia: Artiodactyla): A review based on morphology and cladistical analysis. *Zool Jour Linnean Soc* 143:1–26.
- 49 Harris JM, TE Cerling (2002) Dietary adaptations of extant and Neogene African suids. *Jour Zool* 256: 45–54.
- 50 Cerling TE, Hart JA, Hart TB (2004) Stable isotope ecology in the Ituri Forest. *Oecologia* 138: 5–12.
- 51 Bernor RL, Harris JM (2003) Systematics and evolutionary biology of the Late Miocene and early Pliocene Hipparionine horses from Lothagam, Kenya. In (Harris JM, Leakey MG, eds.), *Lothagam: The Dawn of Humanity in Eastern Africa*. Columbia University Press, New York. pp. 387–438
- 52 Bernor RL, Armour-Chelu MJ, Gilbert H, Kaiser TM, Schulz E (2010) Equidae, In (Werdelin L and Sanders WE, eds) *Cenozoic Mammals of Africa*. University of California Press, p. 685–721.
- 53 Uno KT, et al (2011) Late Miocene to Pliocene carbon isotope record of differential diet change among East Africa herbivores. *Proc Nat Acad Sci* 108: 6509–6514.

- 54 Cerling TE, Harris JM, Leakey MG (1999) Browsing and grazing in modern and fossil proboscideans. *Oecologia* 120: 364–374.
- 55 Cerling TE, Viehl K (2004) Seasonal diet changes of the giant forest hog (*Hylochoerus meinertzhagani* Thomas) based on the carbon isotopic composition of hair. *Afr Jour Ecol* 42: 88–92.
- 56 Levin NE, Simpson SW, Quade J, Cerling TE, Semaw S, SR Frost SR (2008) Herbivore enamel carbon isotopic composition and the environmental context of *Ardipithecus* at Gona, Ethiopia. *Geol Soc Amer Spec Pap* 446: 215–234.
- 57 Harris JM, Cerling TE, Leakey MG, Passey BH (2008) Stable isotope ecology of fossil hippopotamids from the Lake Turkana Basin region of East Africa. *Jour Zool* 275: 323–331.
- 58 Braun DR et al. (2010) Early hominin diet included diverse terrestrial and aquatic animals 1.95 Ma in East Turkana, Kenya. *Proc Nat Acad Sci* 107: 10002–10007.
- 59 Climatological Statistics for East Africa (1975) *Climatological Statistics for East Africa*. East African Meteorological Department, Nairobi.
- 60 Altmann J, Alberts SC, Altmann SA, Roy SB (2002) Dramatic change in local climate patterns in the Amboseli basin, Kenya. *Afr J Ecol* 40:248–251.
- 61 National Climatic Data Center (2014) National Climatic Data Center. Available at: <http://www.ncdc.noaa.gov/cdo-web/datatools/findstation> [Accessed June 7, 2014].
- 62 Yineger H, Kelbessa E, Bekele T, Lulekal E (2008) Floristic composition and structure of the dry Afromontane forest at Bale Mountains National Park, Ethiopia. *Ethiopian J Sci* 31:103–120.
- 63 Yusuf H, Treydte AC, Demissew S, Woldu Z (2011) Assessment of woody species encroachment in the grasslands of Nechisar National Park, Ethiopia. *Afr J Ecol* 49:397–409.
- 64 Ndey JA, Smith KH, Antoninova M (2014) Vegetation & Climate. *Garamba, Conservation in Peace and War*, eds Smith KH, Kalpers J, Arranz L, Ortega N, (Self-published) pp 3–18.
- 65 Makana J-R, Thomas SC (2005) Effects of Light Gaps and Litter Removal on the Seedling Performance of Six African Timber Species. *Biotropica* 37: 227–237.
- 66 Makana J, Hart TB, Liengola I, Ewango C, Hart JA (2004). Ituri forest dynamic plots, Democratic Republic of Congo. *Flora of Tropical East Africa*. Balkema Publishers, Leiden. p. 492-505.
- 67 Hartter J, Ryan SJ, Southworth J, Chapman CA (2011) Landscapes as continuous entities: forest disturbance and recovery in the Albertine Rift landscape. *Landscape Ecol* 26: 877–890.
- 68 Egeru A et al. (2014) Assessing the spatio-temporal climate variability in semi-arid Karamoja subregion in north-eastern Uganda. *Inter Jour Environ Stud* 71: 490–509.
- 69 Yamagiwa J et al. (2012) Long-Term Research on Grauer's Gorillas in Kahuzi-Biega National Park, DRC. (eds Kappeler PM, Watts DP) *Life History, Foraging*



- Strategies, and Ecological Differentiation from Sympatric Chimpanzees. Long-Term Field Studies of Primates*. Springer Berlin Heidelberg, Berlin, Heidelberg, p. 385–412.
- 70 Ngatia LW et al. (2014) Seasonal patterns in decomposition and nutrient release from East African savanna grasses grown under contrasting nutrient conditions. *Agri Ecosys Environ* 188: 12–19.
- 71 Apio A, Muwanika V, Plath M (2009) Seasonal variation in reproductive behaviour of bushbuck (*Tragelaphus scriptus* Pallas, 1766) in an equatorial savannah ecosystem. *Afr J Ecol* 47: 592–597.
- 72 Henschel P, Abernethy KA, White LJT (2005) Leopard food habits in the Lopé National Park, Gabon, Central Africa. *Afr J Ecol* 43: 21–28.
- 73 Demeke Y, Bekele A (2000) Population estimates and threats to elephants *Loxodonta africana* (Blumenbach 1797) in the Mago National Park, Ethiopia. *Trop Zool* 13: 227–237.
- 74 Jacobs MJ, Schloeder CA (2002) Fire frequency and species associations in perennial grasslands of south-west Ethiopia. *Afr J Ecol* 40: 1–9.
- 75 Boutton TW, Tieszen LL, Imbamba SK (1988) Biomass dynamics of grassland vegetation in Kenya. *Afr J Ecol* 26: 89–101.
- 76 Ogutu JO, Piepho HP, Dublin HT (2012) Ostrich recruitment dynamics in relation to rainfall in the Mara–Serengeti ecosystem. *Ostrich* 83: 119–136.
- 77 Awerbeck C, Plath M, Wronski T, Apio A (2012) Effect of human nuisance on the social organization of large mammals: group sizes and compositions of seven ungulate species in Lake Mburo National Park and the adjacent Ankole Ranching Scheme. *Wildl Biol* 18: 180–193.
- 78 Rasmussen HB, Wittemyer G, Douglas-Hamilton I (2006) Predicting time-specific changes in demographic processes using remote-sensing data. *Jour Appl Ecol* 43: 366–376.
- 79 Thompson BW (1966) The mean annual rainfall of Mount Kenya. *Weather* 21: 48–49
- 80 Ogutu JO, Owen-Smith N, Piepho HP, Kuloba B (2012) Dynamics of ungulates in relation to climatic and land use changes in an insularized African savanna ecosystem. *Biodiversity Conserv* 21: 1033–1053.

Table S1. Locations, climate parameters, and dominant biomes of modern sites in East and Central Africa.

| Abbrev <sup>1</sup> | location <sup>2</sup> | Country <sup>3</sup> | MAT <sup>4</sup> | MAP <sup>5</sup> | lat <sup>6</sup> | long <sup>7</sup> | elev <sup>8</sup> | Ref <sup>9</sup> | vegetation description <sup>10</sup>           | UNESCO <sup>11</sup>               |
|---------------------|-----------------------|----------------------|------------------|------------------|------------------|-------------------|-------------------|------------------|------------------------------------------------|------------------------------------|
| ABER                | Aberdares             | Kenya                | 11.6             | 1420             | 0.4 S            | 36.8 E            | 2700*             | 59               | evergreen montane forest                       | forest                             |
| AMBO                | Amboseli              | Kenya                | 24.0             | 350              | 2.6 S            | 37.2 E            | 1140              | 60               | grassland to wooded grassland                  | wooded grassland                   |
| ATHI                | Athi plains           | Kenya                | 19.4             | 850              | 1.5 S            | 37.1 E            | 1640              | 61               | grassland to wooded grassland                  | wooded grassland                   |
| AWSH                | Awash                 | Ethiopia             | 25.0             | 480              | 8.9 N            | 40.0 E            | 1050              | 61               | acacia wooded grassland with riparian woodland | riparian with wooded grassland     |
| BALE                | Bale Mtns             | Ethiopia             | 9.0              | 1220             | 6.9 N            | 39.6 E            | 3500*             | 96               | Afro-Alpine forest to moorland                 | Afro-alpine                        |
| CHYU                | Chyulu Hills          | Kenya                | 21.0             | 650              | 2.6 S            | 37.9 E            | 1850*             | 45               | wooded grassland to grassy woodland            | wooded grassland                   |
| ETHR                | Ethiopian Rift lakes  | Ethiopia             | 20.2             | 510              | 6.0 N            | 37.7 E            | 1540              | 63               | wooded grassland                               | wooded grassland                   |
| GMBA                | Garamba               | DRC                  | 24.4             | 1250             | 4.0 N            | 29.5 E            | 800               | 64               | grassland to woodland, gallery forests         | wooded grassland                   |
| ITRI                | Ituri Forest          | DRC                  | 22.4             | 1640             | 1.8 N            | 29.9 E            | 800               | 65,66            | evergreen forest                               | closed canopy forest               |
| KBLE                | Kibale                | Uganda               | 19.0             | 1660             | 0.5 N            | 30.5 E            | 1250*             | 67               | evergreen forest                               | open to closed canopy forest       |
| KCST                | Kenya Coast           | Kenya                | 25.3             | 1230             | 3.3 S            | 39.9 E            | 30                | 59               | coastal lowland forest                         | open to closed forest              |
| KDPO                | Kidepo                | Uganda               | 25.1             | 810              | 3.9 N            | 33.8 E            | 1120              | 68               | wooded grassland                               | wooded grassland                   |
| KZBG                | Kahuzi-Biega          | DRC                  | 20.1             | 1610             | 2.3 S            | 28.6 E            | 2000*             | 69               | evergreen montane forest                       | closed canopy forest               |
| LAIK                | Laikipia              | Kenya                | 21.8             | 640              | 0.3 N            | 36.9 E            | 1700              | 70               | wooded grassland                               | wooded grassland                   |
| LEDW                | Lake Edward           | Uganda, DRC          | 25.3             | 680              | 0.2 S            | 29.9 E            | 924               | 71               | forest to wooded grassland                     | wooded grassland                   |
| LOPÉ                | Lope                  | Gabon                | 25.5             | 1490             | 0.5 S            | 11.5 E            | 400               | 72               | rainforest                                     | closed canopy forest               |
| MAGO                | Omo / Mago            | Ethiopia             | 26.0             | 830              | 5.5 N            | 36.3 E            | 600               | 73,74            | semi-desert bushland with riparian forest      | riparian with wooded grassland     |
| MARA                | Masai Mara            | Kenya                | 20.5             | 1000             | 1.4 S            | 35.0 E            | 1600              | 75,76            | grassland, with riparian woodland              | wooded grassland                   |
| MBRO                | Lake Mburo            | Uganda               | 21.3             | 890              | 0.6 S            | 31.0 E            | 1300              | 77               | wooded grassland to grassy woodland            | wooded grassland / grassy woodland |
| MERU                | Meru NP               | Kenya                | 23.5             | 380              | 0.1 N            | 38.2 E            | 500               | 59,78            | wooded grassland with riparian woodland        | riparian with wooded grassland     |
| MTKE                | Mt Kenya              | Kenya                | 7.4              | 1250             | 0.3 S            | 37.2 E            | 2700*             | 79               | evergreen forest                               | forest                             |
| NAKG                | Nakuru - shore        | Kenya                | 17.7             | 870              | 0.4 S            | 36.1 E            | 1850              | 59,80            | alkali grassland                               | grassland                          |
| NBNP                | Nairobi NP            | Kenya                | 18.8             | 910              | 1.4 S            | 36.8 E            | 1700              | 59               | grassland to woodland                          | mixed woodland to grassland        |
| RFTV                | Kenya Rift Valley     | Kenya                | 17.3             | 620              | 0.5 S            | 36.1 E            | 1900              | 59               | grassland to woodland                          | mixed woodland to grassland        |
| SAMB                | Samburu               | Kenya                | 23.5             | 380              | 0.6 N            | 37.5 E            | 880               | 59               | semi-desert bushland with riparian woodland    | riparian with wooded grassland     |
| SIME                | Simean Mtns           | Ethiopia             | 8.7              | 1600             | 13.1 N           | 38.4 E            | 3200*             | 61               | Afro-Alpine forest to moorland                 | Afro-alpine                        |
| TANA                | lower Tana River      | Kenya                | 27.5             | 475              | 1.9 S            | 40.1 E            | 40                | 59               | semi-desert bushland with riparian forest      | riparian with wooded grassland     |
| TRKG                | Turkana - grassland   | Kenya                | 29.2             | 180              | 4.0 N            | 36.2 E            | 370               | 59               | alkali grassland                               | grassland                          |
| TRKX                | Turkana - regional    | Kenya                | 29.2             | 180              | 4.2 N            | 36.3 E            | 400               | 59               | semi-desert bushland with riparian woodlands   | dwarf shrubland                    |
| TSVO                | Tsavo region          | Kenya                | 24.9             | 550              | 3.4 S            | 38.6 E            | 530               | 59               | semi-desert bushland with riparian woodland    | riparian with wooded grassland     |

1 abbreviation

2 locality

3 country

4 Mean annual temperature

5 Mean annual precipitation

6 latitude

7 longitude

8 reference elevation (\*sites with high variability in elevation)

9 Reference for climate parameters

10 colloquial description of vegetation

11 UNESCO classification for African vegetation (Ref 1).

Table S2.  $\delta^{13}\text{C}_{1750}$  values for modern East African large mammal by species (except *Madoqua* and *Phacochoerus*) in this study; also classified by the percentage of individuals that are  $\text{C}_4$ -grazers (G), mixed  $\text{C}_3$ - $\text{C}_4$  (M), or  $\text{C}_3$ -browsers (B) based on the isotope values ( $\delta^{13}\text{C}_{1750}$  values  $> -1\text{‰}$ ,  $> -1\text{‰}$  and  $< -8\text{‰}$ , and  $< -8\text{‰}$ , respectively). See Dataset I for complete data.

| Taxon                          | number | $\delta^{13}\text{C}_{1750}$ ( $\pm 1\sigma$ ) | percent |    |     |
|--------------------------------|--------|------------------------------------------------|---------|----|-----|
|                                |        |                                                | G       | M  | B   |
| Artiodactyla                   |        |                                                |         |    |     |
| Bovidae                        |        |                                                |         |    |     |
| Aepycerotini                   |        |                                                |         |    |     |
| <i>Aepyceros melampus</i>      | 66     | -3.9 $\pm$ 2.6                                 | 15      | 77 | 8   |
| Alcelaphini                    |        |                                                |         |    |     |
| <i>Alcelaphus buselaphus</i>   | 54     | 3.3 $\pm$ 1.3                                  | 100     | 0  | 0   |
| <i>Beatragus hunteri</i>       | 2      | 2.0 $\pm$ 0.4                                  | 100     | 0  | 0   |
| <i>Connochaetes taurinus</i>   | 67     | 3.0 $\pm$ 1.2                                  | 100     | 0  | 0   |
| <i>Damaliscus lunatus</i>      | 18     | 3.2 $\pm$ 1.0                                  | 100     | 0  | 0   |
| Antilopini                     |        |                                                |         |    |     |
| <i>Eudorcas thomsonii</i>      | 22     | -1.6 $\pm$ 2.4                                 | 55      | 45 | 0   |
| <i>Litocranius walleri</i>     | 17     | -10.9 $\pm$ 1.0                                | 0       | 0  | 100 |
| <i>Nanger granti</i>           | 73     | -8.5 $\pm$ 3.2                                 | 1       | 36 | 63  |
| <i>Nanger soemmerringii</i>    | 1      | -10.5                                          | 0       | 0  | 100 |
| <i>Ourebia ourebi</i>          | 6      | -2.6 $\pm$ 4.5                                 | 0       | 0  | 100 |
| Bovini                         |        |                                                |         |    |     |
| <i>Syncerus caffer</i>         | 167    | 0.9 $\pm$ 3.3                                  | 84      | 13 | 4   |
| Caprini                        |        |                                                |         |    |     |
| <i>Capra walie</i>             | 1      | -11.1                                          | 0       | 0  | 100 |
| Cephalophini                   |        |                                                |         |    |     |
| <i>Cephalophus adersi</i>      | 2      | -10.6 $\pm$ 3.3                                | 0       | 0  | 100 |
| <i>Cephalophus callipygus</i>  | 4      | -11.7 $\pm$ 4.0                                | 0       | 25 | 75  |
| <i>Cephalophus dorsalis</i>    | 2      | -13.9 $\pm$ 0.9                                | 0       | 0  | 100 |
| <i>Cephalophus leucogaster</i> | 2      | -13.3 $\pm$ 0.3                                | 0       | 0  | 100 |
| <i>Cephalophus natalensis</i>  | 6      | -11.4 $\pm$ 1.3                                | 0       | 0  | 100 |
| <i>Cephalophus nigrifrons</i>  | 13     | -14.3 $\pm$ 1.5                                | 0       | 0  | 100 |
| <i>Cephalophus sylvicultor</i> | 2      | -13.1 $\pm$ 0.8                                | 0       | 0  | 100 |
| <i>Cephalophus weynsi</i>      | 2      | -12.7 $\pm$ 2.5                                | 0       | 0  | 100 |
| <i>Philantomba monticola</i>   | 6      | -12.0 $\pm$ 1.6                                | 0       | 0  | 100 |
| <i>Sylvicapra grimmia</i>      | 16     | -11.1 $\pm$ 1.1                                | 0       | 0  | 100 |
| Hippotragini                   |        |                                                |         |    |     |
| <i>Hippotragus equinus</i>     | 4      | 2.0 $\pm$ 3.0                                  | 75      | 25 | 0   |
| <i>Hippotragus niger</i>       | 5      | 3.9 $\pm$ 0.3                                  | 100     | 0  | 0   |
| <i>Oryx beisa</i>              | 29     | 0.8 $\pm$ 1.9                                  | 90      | 10 | 0   |
| Neotragini                     |        |                                                |         |    |     |
| <i>Madoqua</i> sp.             | 52     | -10.4 $\pm$ 1.7                                | 0       | 10 | 90  |
| <i>Neotragus batesi</i>        | 1      | -24.1                                          | 0       | 0  | 100 |
| <i>Neotragus moschatus</i>     | 13     | -12.6 $\pm$ 0.7                                | 0       | 0  | 100 |
| <i>Oreotragus oreotragus</i>   | 9      | -10.9 $\pm$ 1.4                                | 33      | 67 | 0   |
| <i>Raphicerus campestris</i>   | 12     | -10.7 $\pm$ 1.0                                | 0       | 0  | 100 |
| Reduncini                      |        |                                                |         |    |     |
| <i>Kobus ellipsiprymnus</i>    | 55     | 1.9 $\pm$ 1.3                                  | 96      | 4  | 0   |
| <i>Kobus kob</i>               | 17     | 2.3 $\pm$ 1.0                                  | 100     | 0  | 0   |
| <i>Redunca fulvorufula</i>     | 4      | 2.3 $\pm$ 1.0                                  | 100     | 0  | 0   |
| <i>Redunca redunca</i>         | 14     | 0.7 $\pm$ 4.0                                  | 71      | 29 | 0   |
| Tragelaphini                   |        |                                                |         |    |     |

|                                   |     |            |     |    |     |
|-----------------------------------|-----|------------|-----|----|-----|
| <i>Taurotragus oryx</i>           | 35  | -8.5 ±2.0  | 0   | 31 | 69  |
| <i>Tragelaphus buxtoni</i>        | 5   | -11.4 ±1.0 | 0   | 0  | 100 |
| <i>Tragelaphus euryceros</i>      | 5   | -14.9 ±0.9 | 0   | 0  | 100 |
| <i>Tragelaphus imberbis</i>       | 18  | -9.2 ±2.0  | 0   | 28 | 72  |
| <i>Tragelaphus scriptus</i>       | 48  | -12.1 ±1.7 | 0   | 0  | 100 |
| <i>Tragelaphus spekei</i>         | 5   | -13.1 ±5.1 | 0   | 20 | 80  |
| <i>Tragelaphus strepsiceros</i>   | 10  | -9.6 ±2.2  | 0   | 20 | 80  |
| Giraffidae                        |     |            |     |    |     |
| <i>Giraffa camelopardalis</i>     | 61  | -10.6 ±1.6 | 0   | 7  | 93  |
| <i>Okapia johnstoni</i>           | 2   | -19.5 ±0.1 | 0   | 0  | 100 |
| Hippopotamidae                    |     |            |     |    |     |
| <i>Choeropsis liberiensis</i>     | 1   | -15.2      | 0   | 0  | 100 |
| <i>Hippopotamus amphibius</i>     | 186 | -2.1 ±2.6  | 36  | 61 | 3   |
| Suidae                            |     |            |     |    |     |
| <i>Hylochoerus meinertzhageni</i> | 26  | -14.1 ±3.3 | 0   | 0  | 100 |
| <i>Phacochoerus</i> sp.           | 101 | 0.1 ±2.4   | 80  | 18 | 2   |
| <i>Potamochoerus larvatus</i>     | 23  | -8.7 ±4.2  | 4   | 39 | 57  |
| <i>Potamochoerus porcus</i>       | 23  | -13.1 ±2.0 | 0   | 4  | 96  |
| Tragulidae                        |     |            |     |    |     |
| <i>Hyemoschus aquaticus</i>       | 1   | -13.9      | 0   | 0  | 100 |
| Perissodactyla                    |     |            |     |    |     |
| Equidae                           |     |            |     |    |     |
| <i>Equus burchellii</i>           | 129 | 1.5 ±1.3   | 96  | 4  | 0   |
| <i>Equus grevyi</i>               | 28  | -0.6 ±2.2  | 68  | 29 | 4   |
| Rhinocerotidae                    |     |            |     |    |     |
| <i>Ceratotherium simum</i>        | 13  | 1.4 ±1.2   | 100 | 0  | 0   |
| <i>Diceros bicornis</i>           | 145 | -10.2 ±1.2 | 0   | 6  | 94  |
| Proboscidea                       |     |            |     |    |     |
| Elephantidae                      |     |            |     |    |     |
| <i>Loxodonta africana</i>         | 225 | -9.2 ±2.4  | 0   | 24 | 76  |
| <i>Loxodonta cyclotis</i>         | 55  | -14.1 ±1.3 | 0   | 0  | 100 |

TABLE S3. Percentages of APP taxa that are C<sub>4</sub>-grazers (G), mixed C<sub>3</sub>-C<sub>4</sub> feeders (M), and C<sub>3</sub>-browsers (B) based on stable isotopes for ecosystems considered in this study. N is the total number of large mammal taxa analyzed in each locale/ecosystem.

| Locale | Ecosystem                          | N  | G  | M  | B   |
|--------|------------------------------------|----|----|----|-----|
| ABER   | forest                             | 10 | 10 | 20 | 70  |
| AMBO   | wooded grassland                   | 10 | 50 | 30 | 20  |
| ATHI   | wooded grassland                   | 11 | 36 | 18 | 45  |
| AWSH   | riparian with wooded grassland     | 9  | 44 | 22 | 33  |
| BALE   | Afro-alpine                        | 6  | 0  | 50 | 50  |
| CHYU   | wooded grassland                   | 9  | 33 | 33 | 33  |
| ETHR   | wooded grassland                   | 9  | 44 | 22 | 33  |
| GMBA   | wooded grassland                   | 8  | 50 | 25 | 25  |
| ITRI   | closed canopy forest               | 10 | 0  | 0  | 100 |
| KBLE   | open to closed canopy forest       | 5  | 20 | 0  | 80  |
| KCST   | open to closed forest              | 7  | 14 | 14 | 71  |
| KDPO   | wooded grassland                   | 7  | 71 | 0  | 29  |
| KZBG   | closed canopy forest               | 5  | 0  | 0  | 100 |
| LAIK   | wooded grassland                   | 15 | 47 | 13 | 40  |
| LEDW   | wooded grassland                   | 8  | 50 | 13 | 38  |
| LOPE   | closed canopy forest               | 5  | 0  | 20 | 80  |
| MAGO   | riparian with wooded grassland     | 10 | 40 | 30 | 30  |
| MARA   | wooded grassland                   | 13 | 38 | 31 | 31  |
| MBRO   | wooded grassland / grassy woodland | 8  | 75 | 13 | 13  |
| MERU   | riparian with wooded grassland     | 11 | 45 | 18 | 36  |
| MTKE   | forest                             | 9  | 0  | 33 | 67  |
| NAKG   | grassland                          | 8  | 75 | 25 | 0   |
| NBNP   | mixed woodland to grassland        | 11 | 36 | 27 | 36  |
| RFTV   | mixed woodland to grassland        | 10 | 50 | 20 | 30  |
| SAMB   | riparian with wooded grassland     | 12 | 42 | 17 | 42  |
| SIME   | Afro-alpine                        | 5  | 0  | 0  | 100 |
| TANA   | riparian with wooded grassland     | 14 | 36 | 36 | 29  |
| TRKG   | grassland                          | 6  | 83 | 17 | 0   |
| TRKX   | dwarf shrubland                    | 9  | 33 | 0  | 67  |
| TSVO   | riparian with wooded grassland     | 14 | 43 | 21 | 36  |

Table S4. Average  $\delta^{13}\text{C}$  values for fossil APP (Artiodactyla, Perissodactyla, and Proboscidea) taxa in the Turkana Basin by time interval, and average  $\delta^{13}\text{C}$  values for equivalent taxa in East and Central Africa.

| Taxon used               | N   | $\delta^{13}\text{C}$ - Age intervals (Ma) |            |            |            |          |             |            |            |            | Modern | N             | $\delta^{13}\text{C}$ |
|--------------------------|-----|--------------------------------------------|------------|------------|------------|----------|-------------|------------|------------|------------|--------|---------------|-----------------------|
|                          |     | 4.3 to 4.0                                 | 4.0 to 3.4 | 3.4 to 3.0 | 3.0 to 2.5 | 2.5-2.35 | 2.35 to 1.9 | 1.9 to 1.5 | 1.5 to 1.3 | 1.3 to 1.0 |        |               |                       |
| Artiodactyla             |     |                                            |            |            |            |          |             |            |            |            |        |               |                       |
| Bovidae                  |     |                                            |            |            |            |          |             |            |            |            |        |               |                       |
| Aepycerotini             | 67  | -4.3                                       | -0.5       | -2.2       | -2.0       |          | -0.2        | -1.2       | -1.1       | -1.4       |        | 66            | -3.9                  |
| Alcelaphini              | 129 | 1.0                                        | -0.2       | 0.8        | 1.1        | 1.0      | 1.2         | 1.1        | 1.0        | 2.0        |        | 141           | 3.1                   |
| Antilopini               | 38  | -7.6                                       | -2.0       | -2.9       | -0.9       |          | -2.1        | -0.7       | -2.5       |            |        | 122           | -7.7                  |
| Bovini                   | 21  |                                            | -2.6       | -2.7       | -1.9       |          | -0.2        | 0.7        | 1.0        | 2.1        |        | 167           | 0.9                   |
| Caprini                  |     |                                            |            |            |            |          |             |            |            |            |        | 1             | -11.1                 |
| Cephalophini             |     |                                            |            |            |            |          |             |            |            |            |        | 63            | -12.5                 |
| Hippotragini             | 17  |                                            |            | -3.6       | -2.2       |          | 0.5         | 0.6        | -0.3       |            |        | 38            | 1.3                   |
| Neotragini               | 1   | -11.6                                      |            |            |            |          |             |            |            |            |        | 84            | -10.4                 |
| Reduncini                | 43  |                                            |            |            | -0.2       | -0.8     | -0.2        | 0.5        | 0.3        | 0.6        |        | 90            | 1.8                   |
| Tragelaphini             | 43  | -7.8                                       | -9.3       | -6.0       | -7.3       | -3.0     | -4.0        | -5.6       | -6.0       | -4.1       |        | 126           | -10.6                 |
| Camelidae                |     |                                            |            |            |            |          |             |            |            |            |        |               |                       |
| <i>Camelus</i>           | 2   |                                            |            | -10.0      | -7.3       |          |             |            |            |            |        | domestic only |                       |
| Giraffidae               |     |                                            |            |            |            |          |             |            |            |            |        |               |                       |
| <i>Giraffa</i>           | 38  | -11.5                                      | -12.2      | -11.2      | -11.6      | -12.8    | -11.2       | -11.6      | -10.8      |            |        | 61            | -10.6                 |
| <i>Sivatherium</i>       | 24  | -10.2                                      |            | -10.9      | -9.8       |          | -4.6        | -1.5       | 0.9        |            |        | 2             | -19.5                 |
| Hippopotamidae           |     |                                            |            |            |            |          |             |            |            |            |        |               |                       |
| <i>Hippopotamus</i> s.l. | 115 | -3.0                                       | -4.4       | -3.7       | -2.9       | -2.3     | -0.9        | -1.4       | -1.3       | 0.0        |        | 186           | -2.1                  |
| Suidae                   |     |                                            |            |            |            |          |             |            |            |            |        |               |                       |
| <i>Kolpochoerus</i>      | 38  |                                            |            |            | -1.7       |          | 0.2         | -0.6       | -0.4       |            |        | 26            | -14.1                 |
| <i>Metridiochoerus</i>   | 67  |                                            |            |            | -0.2       |          | -0.3        | -0.2       | 0.1        | 0.0        |        | 101           | 0.1                   |
| <i>Notochoerus</i>       | 28  | -3.9                                       | -2.8       | -1.4       | -0.8       |          | -0.7        | -1.6       |            |            |        |               | Extinct               |
| <i>Nyanzachoerus</i>     | 7   | -2.3                                       | -2.7       | -2.9       |            |          |             |            |            |            |        | 46            | -10.9                 |
| Tragulidae               |     |                                            |            |            |            |          |             |            |            |            |        |               |                       |
| <i>Hyemoschus</i>        |     |                                            |            |            |            |          |             |            |            |            |        | 1             | -13.9                 |
| Perissodactyla           |     |                                            |            |            |            |          |             |            |            |            |        |               |                       |
| Equidae                  |     |                                            |            |            |            |          |             |            |            |            |        |               |                       |
| <i>Equus</i>             | 39  |                                            |            |            |            |          | 0.0         | 0.2        | -0.6       | -0.7       |        | 157           | 1.1                   |
| <i>Eurygnathohippus</i>  | 33  | 1.2                                        | -0.9       | -1.3       | -0.1       |          | 0.7         | -0.3       | -0.2       |            |        |               | Extinct               |
| Rhinocerotidae           |     |                                            |            |            |            |          |             |            |            |            |        |               |                       |
| Rhino G                  | 19  | -0.2                                       | -0.8       | 0.1        |            | -0.3     | 0.9         | 0.3        |            | 1.3        |        | 13            | 1.4                   |
| Rhino B                  | 17  | -10.2                                      |            | -11.9      | -9.3       |          |             |            |            |            |        | 145           | -10.2                 |
| Proboscidea              |     |                                            |            |            |            |          |             |            |            |            |        |               |                       |
| Deinotheriidae           |     |                                            |            |            |            |          |             |            |            |            |        |               |                       |
| <i>Deinotherium</i>      | 28  | -12.6                                      | -13.0      | -11.1      | -13.3      | -13.2    | -12.6       | -11.8      |            |            |        |               | Extinct               |

|                                                           |            |            |            |            |          |            |            |            |            |      |                         |              |
|-----------------------------------------------------------|------------|------------|------------|------------|----------|------------|------------|------------|------------|------|-------------------------|--------------|
| Gomphotheriidae                                           |            |            |            |            |          |            |            |            |            |      | Gomphotheriidae         |              |
| <i>Anancus</i>                                            | 1          | -0.1       |            |            |          |            |            |            |            |      | <i>Anancus</i>          | Extinct      |
| Elephantidae                                              |            |            |            |            |          |            |            |            |            |      | Elephantidae            |              |
| <i>Elephas</i>                                            | 43         | -2.7       | -2.1       | -0.6       | -0.7     | -2.5       | 0.1        | -0.4       | -1.5       | -0.2 | <i>Elephas</i>          | Extirpated   |
| <i>Loxodonta</i>                                          | 18         | -2.3       | -2.1       | -1.8       | 0.4      |            | 0.1        | 0.3        |            |      | <i>Loxodonta</i>        | 280<br>-10.2 |
| Total number of taxa<br>(ex. Neotragini and Cephalophini) | 17<br>(16) | 14<br>(14) | 18<br>(18) | 19<br>(19) | 8<br>(8) | 19<br>(19) | 20<br>(20) | 15<br>(15) | 10<br>(10) |      | All East/Central Africa | 21<br>(19)   |

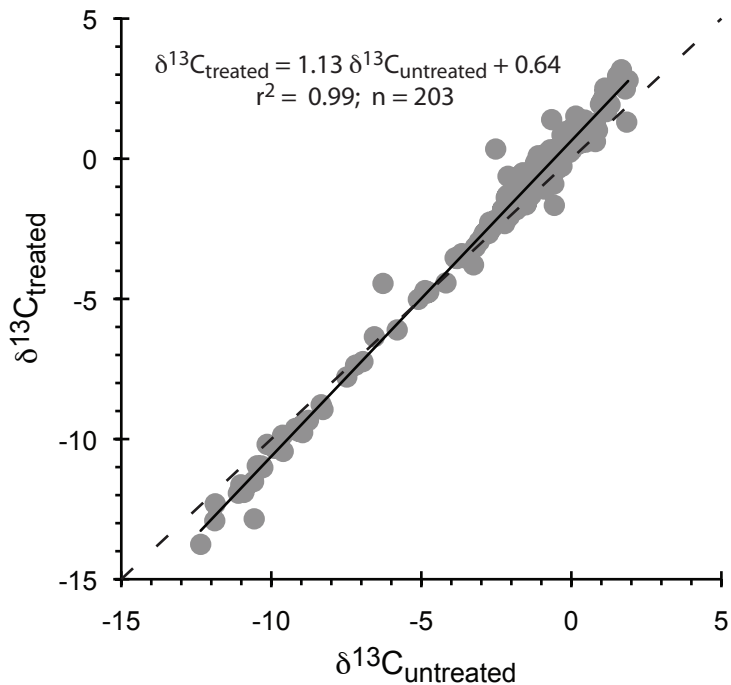

Figure S1.  $\delta^{13}\text{C}$  comparing results for treated and untreated sample powders. The least squares best-fit is shown as a solid line; the 1:1 line is shown as a dashed line.



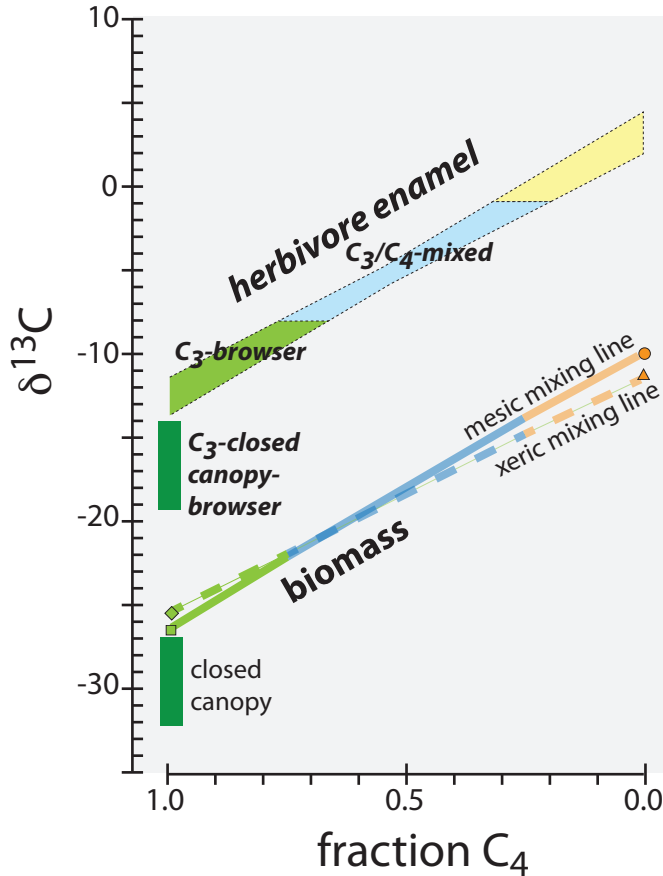

Figure S2. Mixing lines for vegetation from xeric and mesic biomes (lower lines) based on  $\delta^{13}\text{C}_{1750}$  values on previously published data (23, 86): xeric (lower dashed line) is based on  $\text{C}_3$  and  $\text{C}_4$  plants from Samburu, Mpala, and Turkana with end-member  $\delta^{13}\text{C}_{1750}$  values of -25.6 (green diamond) and -11.2‰ (orange triangle), respectively; mesic (lower solid line) is based on  $\text{C}_3$  and  $\text{C}_4$  plants from the Aberdares (forest) and the Athi plains (wooded grassland to grassland) with  $\delta^{13}\text{C}_{1750}$  values of -26.6 (green square) and -10.2‰ (orange circle), respectively; closed canopy is based on  $\text{C}_3$  plants from the Ituri Forest. Isotope enrichment (23, 28) of  $^{13}\text{C}$  from biomass to tooth enamel ranges from 13.3‰ (suids) to 14.6‰ (bovid ruminants) and results in the upper shaded mixing line for enamel; the thickness of the line is due to the uncertainty in end-member values for  $\text{C}_3$  and  $\text{C}_4$  plants in xeric and mesic ecosystems and to the range in isotope enrichment values. Diets derived from closed canopy vegetation are considered to have  $\delta^{13}\text{C}_{1750}$  enamel values  $< -14$ ‰ (dark green);  $\text{C}_3$ -browsers are from -14‰ to -8‰ (green); mixed  $\text{C}_3/\text{C}_4$  are from -8‰ to 1‰ (blue); and  $\text{C}_4$ -grazers are  $> -1$ ‰ (yellow).

A

# Modern APP

(all)

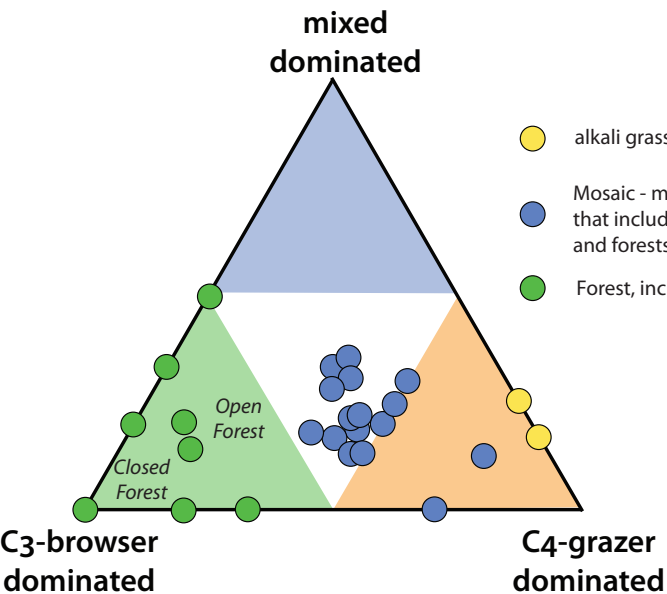

B

# Modern APP

(excluding Cephalophini and Neotragini)

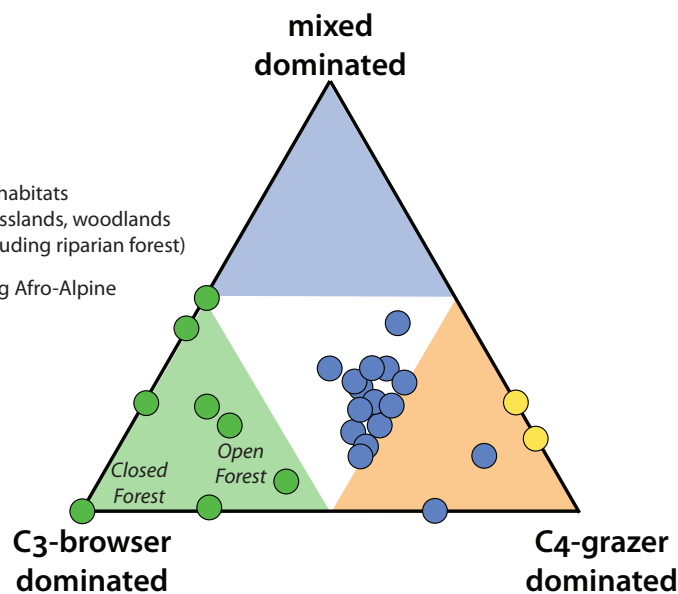

Figure S3. Ternary plot of Artiodactyla-Perrisodactyla-Proboscidea (APP) C<sub>3</sub>-browsing, mixed C<sub>3</sub>-C<sub>4</sub>, and C<sub>4</sub>-grazing taxa from the modern sites considered in this study. Each taxon in each locality is represented by the average  $\delta^{13}\text{C}$  value for that respective taxon (data from Dataset SI I). The green, blue, and orange triangles represent regions where > 50% of the taxa are C<sub>3</sub>-browsers, C<sub>3</sub>-C<sub>4</sub> mixed feeders, or C<sub>4</sub>-grazers, respectively. A. All APP taxa. B. APP taxa, but excluding Neotragini and Cephalophini.

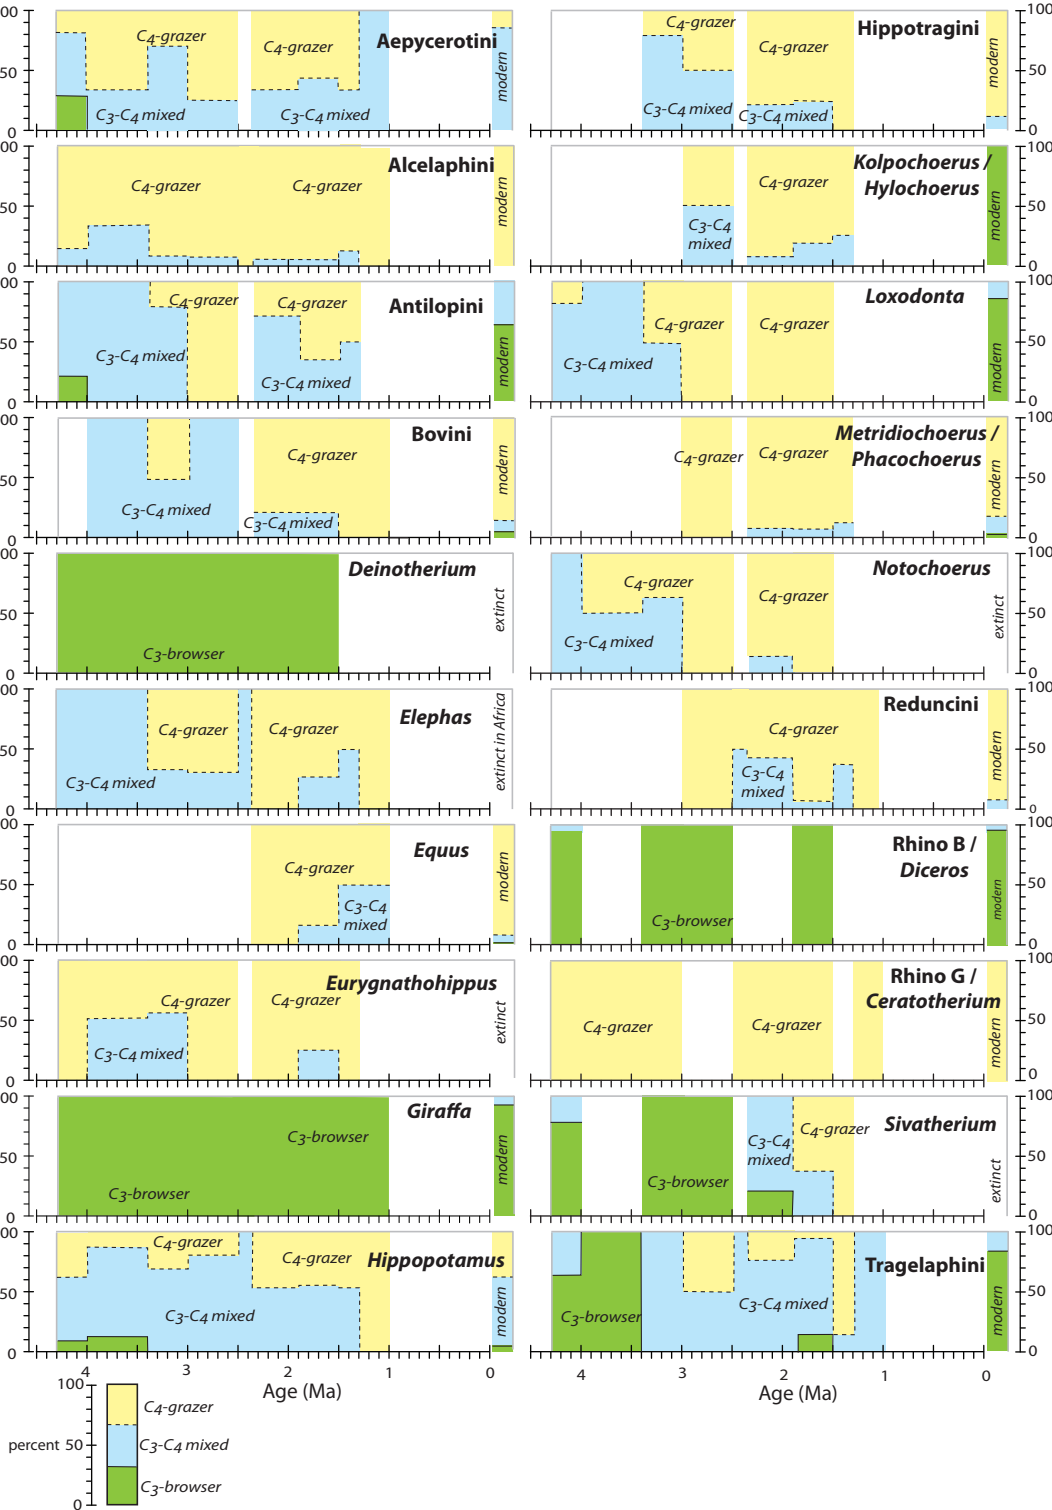

Figure S4. Percent G:M:B (shaded yellow, blue, and green, respectively) of APP major lineages through time in the Kanapoi, Koobi Fora, and Nachukui Formations. Modern fractions shown on the left side of each lineage. Compiled from Datasets I and II.

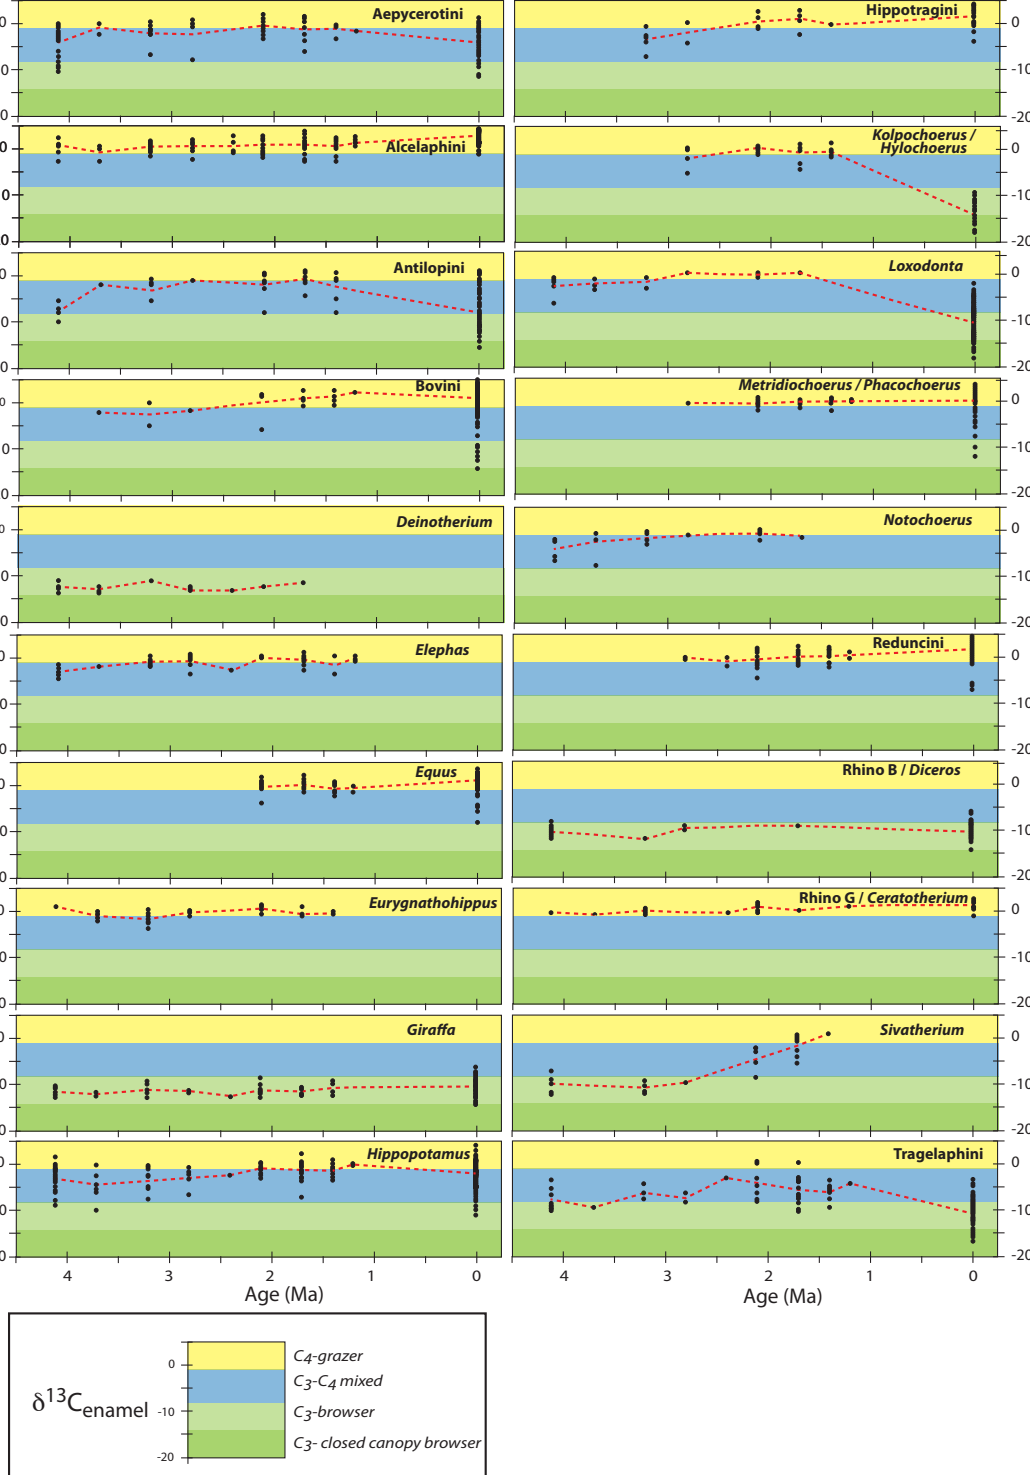

Figure S5.  $\delta^{13}\text{C}$  values of major APP lineages through time in the Kanopoi, Koobi Fora, and Nachukui Formations (from Dataset II); modern values include all samples from East and Central Africa in Dataset I for each taxon plotted. Shaded fields (yellow, blue, green, dark green) show  $\text{C}_4$ -grazers,  $\text{C}_3$ - $\text{C}_4$ -mixed feeders,  $\text{C}_3$ -browsers, and  $\text{C}_3$ -closed canopy browsers, respectively.
